# Supplementary material for: Morpho-physiological traits, biochemical response and phytoextraction potential of short-term copper stress on kenaf (Hibiscus cannabinus L.) seedlings
Source: PeerJ. 2020 Jan 30;8:e8321. doi: 10.7717/peerj.8321 (PMC6995661; doi:10.7717/peerj.8321)
Supplement: Data S1 [file peerj-08-8321-s001.xlsx]

## Sheet: Morphology
Treatment	RL	SL	TL	PD	FW	DW
0	6.5	16.3	22.8	1.56	1.56	0.74
0	6.7	16.9	23.6	1.58	1.58	0.75
0	6.9	17	23.9	1.59	1.59	0.71
60	5.2	13.8	19	1.41	1.44	0.61
60	5.3	14	19.3	1.38	1.41	0.62
60	5.1	14.2	19.3	1.37	1.38	0.59
120	4.3	12.6	16.9	1.24	1.24	0.54
120	4.5	11	15.5	1.21	1.2	0.55
120	4.6	11.5	16.1	1.2	1.16	0.51
180	3.4	9.5	12.9	1.12	0.84	0.35
180	3.6	9.2	12.8	1.07	0.86	0.36
180	3.9	8.2	12.1	1.09	0.87	0.39

## Sheet: Cu determ.
		Roots						Leaves					Stem
Treatment	Observ.		Cu			Treatment	Observ.		Cu		Treatment	Observ.		Cu
0	0.02	0.5	5			0	0.02	0.5	5		0	0.01	0.25	2.5
0	0.02	0.5	5			0	0.02	0.5	5		0	0.02	0.5	5
0	0.03	0.75	7.5			0	0.01	0.25	2.5		0	0.01	0.25	2.5
60	0.14	3.5	35			60	0.09	2.25	22.5		60	0.06	1.5	15
60	0.13	3.25	32.5			60	0.1	2.5	25		60	0.07	1.75	17.5
60	0.12	3	30			60	0.11	2.75	27.5		60	0.07	1.75	17.5
120	0.28	7	70			120	0.23	5.75	57.5		120	0.19	4.75	47.5
120	0.26	6.5	65			120	0.24	6	60		120	0.18	4.5	45
120	0.27	6.75	67.5			120	0.21	5.25	52.5		120	0.17	4.25	42.5
180	0.41	10.25	102.5			180	0.35	8.75	87.5		180	0.29	7.25	72.5
180	0.38	9.5	95			180	0.33	8.25	82.5		180	0.3	7.5	75
180	0.43	10.75	107.5			180	0.36	9	90		180	0.31	7.75	77.5

## Sheet: Gaseous Exch.
Net photo			Transp rate			Stomat Conduc			Intercell CO2
Treat	Read		Treat	Read		Treat	Read		Treat	Read
0	11.2		0	8.6		0	0.29		0	224
0	11.6		0	8.4		0	0.26		0	226
0	12		0	8.2		0	0.25		0	230
60	8.9		60	6.5		60	0.18		60	211
60	8.6		60	6.3		60	16		60	209
60	8.1		60	6.1		60	0.15		60	205
120	7.4		120	5.4		120	0.1		120	199
120	7.1		120	5.2		120	0.09		120	196
120	6.8		120	5		120	0.09		120	195
180	5.1		180	3.9		180	0.05		180	184
180	5		180	3.8		180	0.04		180	188
180	4.8		180	3.5		180	0.04		180	190

## Sheet: Chlorophyll
Treat	470	649	665			Chl A			Chl B					Caro	Total Chl
0	0.304	0.105	0.189	2.95785	0.7707	2.18715	2.84025	2.11869	0.72156	304	6.12402	93.2256	204.65	0.835308	2.90871
0	0.325	0.107	0.185	2.89525	0.78538	2.10987	2.89435	2.07385	0.8205	325	5.90764	106.009	213.084	0.86973	2.93037
0	0.329	0.108	0.184	2.8796	0.79272	2.08688	2.9214	2.06264	0.85876	329	5.84326	110.952	212.205	0.866143	2.94564
60	0.284	0.088	0.144	2.2536	0.64592	1.60768	2.3804	1.61424	0.76616	284	4.5015	98.9879	180.511	0.736778	2.37384
60	0.289	0.09	0.146	2.2849	0.6606	1.6243	2.4345	1.63666	0.79784	289	4.54804	103.081	181.371	0.74029	2.42214
60	0.275	0.085	0.141	2.20665	0.6239	1.58275	2.29925	1.58061	0.71864	275	4.4317	92.8483	177.72	0.725388	2.30139
120	0.189	0.075	0.135	2.11275	0.5505	1.56225	2.02875	1.51335	0.5154	189	4.3743	66.5897	118.036	0.48178	2.07765
120	0.191	0.074	0.133	2.08145	0.54316	1.53829	2.0017	1.49093	0.51077	191	4.30721	65.9915	120.701	0.492658	2.04906
120	0.195	0.076	0.106	1.6589	0.55784	1.10106	2.0558	1.18826	0.86754	195	3.08297	112.086	79.8309	0.32584	1.9686
180	0.171	0.058	0.088	1.3772	0.42572	0.95148	1.5689	0.98648	0.58242	171	2.66414	75.2487	93.0872	0.379948	1.5339
180	0.199	0.066	0.084	1.3146	0.48444	0.83016	1.7853	0.94164	0.84366	199	2.32445	109.001	87.6747	0.357856	1.67382
180	0.18	0.061	0.089	1.39285	0.44774	0.94511	1.65005	0.99769	0.65236	180	2.64631	84.2849	93.0688	0.379873	1.59747

## Sheet: MDA
						Roots
	450	532	600		532-600	6.45*		C				MDA
0	0.106	0.104	0.048	4.8243	0.056	0.3612	0.05936	0.30184	0.422576	0.60368	0.90552	9.0552
0	0.104	0.106	0.045	0.5319	0.061	0.39345	0.05824	0.33521	0.469294	0.67042	1.00563	10.0563
0	0.051	0.107	0.04	10.5534	0.067	0.43215	0.02856	0.40359	0.565026	0.80718	1.21077	12.1077
60	0.253	0.298	0.121	6.75	0.177	1.14165	0.14168	0.99997	1.39996	1.99994	2.99991	29.9991
60	0.255	0.294	0.106	5.3457	0.188	1.2126	0.1428	1.0698	1.49772	2.1396	3.2094	32.094
60	0.268	0.29	0.091	3.5121	0.199	1.28355	0.15008	1.13347	1.58686	2.26694	3.40041	34.0041
120	0.534	0.395	0.064	8.2674	0.331	2.13495	0.29904	1.83591	2.57027	3.67182	5.50773	55.0773
120	0.521	0.428	0.091	21.4365	0.337	2.17365	0.29176	1.88189	2.63465	3.76378	5.64567	56.4567
120	0.501	0.441	0.099	51.2511	0.342	2.2059	0.28056	1.92534	2.69548	3.85068	5.77602	57.7602
180	0.684	0.521	0.074	9.0645	0.447	2.88315	0.38304	2.50011	3.50015	5.00022	7.50033	75.0033
180	0.694	0.531	0.076	0.996	0.455	2.93475	0.38864	2.54611	3.56455	5.09222	7.63833	76.3833
180	0.661	0.541	0.075	6.7275	0.466	3.0057	0.37016	2.63554	3.68976	5.27108	7.90662	79.0662
						Leaves
	450	532	600		532-600	6.45*		C				MDA
0	0.101	0.103	0.064	4.8243	0.039	0.25155	0.05656	0.19499	0.272986	0.38998	0.58497	5.8497
0	0.103	0.111	0.074	0.5319	0.037	0.23865	0.05768	0.18097	0.253358	0.36194	0.54291	5.4291
0	0.106	0.119	0.076	10.5534	0.043	0.27735	0.05936	0.21799	0.305186	0.43598	0.65397	6.5397
60	0.126	0.169	0.084	6.75	0.085	0.54825	0.07056	0.47769	0.668766	0.95538	1.43307	14.3307
60	0.136	0.194	0.096	5.3457	0.098	0.6321	0.07616	0.55594	0.778316	1.11188	1.66782	16.6782
60	0.142	0.209	0.091	3.5121	0.118	0.7611	0.07952	0.68158	0.954212	1.36316	2.04474	20.4474
120	0.421	0.321	0.074	8.2674	0.247	1.59315	0.23576	1.35739	1.90035	2.71478	4.07217	40.7217
120	0.415	0.318	0.068	21.4365	0.25	1.6125	0.2324	1.3801	1.93214	2.7602	4.1403	41.403
120	0.431	0.331	0.061	51.2511	0.27	1.7415	0.24136	1.50014	2.1002	3.00028	4.50042	45.0042
180	0.523	0.429	0.064	9.0645	0.365	2.35425	0.29288	2.06137	2.88592	4.12274	6.18411	61.8411
180	0.515	0.44	0.084	0.996	0.356	2.2962	0.2884	2.0078	2.81092	4.0156	6.0234	60.234
180	0.51	0.431	0.08	6.7275	0.351	2.26395	0.2856	1.97835	2.76969	3.9567	5.93505	59.3505

## Sheet: H2O2
		Roots						Leaves
Treat				SOD		Treat				SOD
0	0.089	0.089	0.002	44.5		0	0.059	0.059	0.002	29.5
0	0.085	0.085	0.002	42.5		0	0.061	0.061	0.002	30.5
0	0.082	0.082	0.002	41		0	0.068	0.068	0.002	34
60	0.321	0.321	0.002	160.5		60	0.251	0.251	0.002	125.5
60	0.329	0.329	0.002	164.5		60	0.259	0.259	0.002	129.5
60	0.339	0.339	0.002	169.5		60	0.263	0.263	0.002	131.5
120	0.51	0.51	0.002	255		120	0.417	0.417	0.002	208.5
120	0.501	0.501	0.002	250.5		120	0.411	0.411	0.002	205.5
120	0.491	0.491	0.002	245.5		120	0.402	0.402	0.002	201
180	0.745	0.745	0.002	372.5		180	0.579	0.579	0.002	289.5
180	0.749	0.749	0.002	374.5		180	0.594	0.594	0.002	297
180	0.759	0.759	0.002	379.5		180	0.612	0.612	0.002	306

## Sheet: EL
		Roots						Leaves
Treat	EC1	EC2	EC1/EC2	*100		Treat	EC1	EC2	EC1/EC2	*100
0	12	80	0.15	15		0	29	310	0.0935484	9.35484
0	16	100	0.16	16		0	26	324	0.0802469	8.02469
0	25	139	0.179856	17.9856		0	25	356	0.0702247	7.02247
60	15	34	0.441176	44.1176		60	21	80	0.2625	26.25
60	11	24	0.458333	45.8333		60	20	71	0.28169	28.169
60	9	19	0.473684	47.3684		60	18	60	0.3	30
120	7	11	0.636364	63.6364		120	15	32	0.46875	46.875
120	6	9	0.666667	66.6667		120	14	29	0.482759	48.2759
120	6	8.9	0.674157	67.4157		120	13	25	0.52	52
180	5	6.4	0.78125	78.125		180	8	13	0.615385	61.5385
180	4	5	0.8	80		180	7	10.9	0.642202	64.2202
180	4	4.8	0.833333	83.3333		180	6	8.6	0.697674	69.7674

## Sheet: SOD
Treat		Roots		SOD		Treat		Leaves		SOD
0	0.328	0.057	0.00385	14.8052		0	0.351	0.034	0.00385	8.83117
0	0.321	0.064	0.00385	16.6234		0	0.349	0.036	0.00385	9.35065
0	0.32	0.065	0.00385	16.8831		0	0.345	0.04	0.00385	10.3896
60	0.184	0.201	0.00385	52.2078		60	0.241	0.144	0.00385	37.4026
60	0.18	0.205	0.00385	53.2468		60	0.238	0.147	0.00385	38.1818
60	0.175	0.21	0.00385	54.5455		60	0.22	0.165	0.00385	42.8571
120	0.116	0.269	0.00385	69.8701		120	0.145	0.24	0.00385	62.3377
120	0.114	0.271	0.00385	70.3896		120	0.156	0.229	0.00385	59.4805
120	0.101	0.284	0.00385	73.7662		120	0.166	0.219	0.00385	56.8831
180	0.13	0.255	0.00385	66.2338		180	0.199	0.186	0.00385	48.3117
180	0.139	0.246	0.00385	63.8961		180	0.202	0.183	0.00385	47.5325
180	0.145	0.24	0.00385	62.3377		180	0.209	0.176	0.00385	45.7143

## Sheet: POD
						Roots
Treat	30 s	60 s	90 s	120 s	150 s	180 s		60-30	90-60	120-90	150-120	180-120	Mean				POD
0	0.051	0.099	0.129	0.153	0.162	0.33		0.048	0.03	0.024	0.009	0.168	0.0558	0.001	0.01	2	35.8423
0	0.059	0.111	0.134	0.169	0.189	0.31		0.052	0.023	0.035	0.02	0.121	0.0502	0.001	0.01	2	39.8406
0	0.055	0.108	0.128	0.165	0.195	0.289		0.053	0.02	0.037	0.03	0.094	0.0468	0.001	0.01	2	42.735
60	0.078	0.099	0.129	0.153	0.162	0.175		0.021	0.03	0.024	0.009	0.013	0.0194	0.001	0.01	2	103.093
60	0.075	0.095	0.121	0.141	0.16	0.17		0.02	0.026	0.02	0.019	0.01	0.019	0.001	0.01	2	105.263
60	0.071	0.094	0.114	0.137	0.152	0.163		0.023	0.02	0.023	0.015	0.011	0.0184	0.001	0.01	2	108.696
120	0.079	0.089	0.111	0.128	0.139	0.151		0.01	0.022	0.017	0.011	0.012	0.0144	0.001	0.01	2	138.889
120	0.075	0.081	0.104	0.124	0.131	0.144		0.006	0.023	0.02	0.007	0.013	0.0138	0.001	0.01	2	144.928
120	0.082	0.089	0.109	0.121	0.124	0.15		0.007	0.02	0.012	0.003	0.026	0.0136	0.001	0.01	2	147.059
180	0.061	0.079	0.089	0.105	0.128	0.137		0.018	0.01	0.016	0.023	0.009	0.0152	0.001	0.01	2	131.579
180	0.058	0.068	0.085	0.101	0.124	0.135		0.01	0.017	0.016	0.023	0.011	0.0154	0.001	0.01	2	129.87
180	0.051	0.062	0.081	0.095	0.117	0.131		0.011	0.019	0.014	0.022	0.014	0.016	0.001	0.01	2	125
						Leaves
Treat	30 s	60 s	90 s	120 s	150 s	180 s		60-30	90-60	120-90	150-120	180-120	Mean				POD
0	0.045	0.089	0.143	0.169	0.251	0.445		0.044	0.054	0.026	0.082	0.194	0.08	0.001	0.01	2	25
0	0.051	0.154	0.241	0.306	0.42	0.499		0.103	0.087	0.065	0.114	0.079	0.0896	0.001	0.01	2	22.3214
0	0.055	0.141	0.264	0.384	0.428	0.54		0.086	0.123	0.12	0.044	0.112	0.097	0.001	0.01	2	20.6186
60	0.067	0.089	0.124	0.164	0.175	0.2		0.022	0.035	0.04	0.011	0.025	0.0266	0.001	0.01	2	75.188
60	0.065	0.081	0.114	0.151	0.164	0.199		0.016	0.033	0.037	0.013	0.035	0.0268	0.001	0.01	2	74.6269
60	0.069	0.095	0.129	0.172	0.189	0.21		0.026	0.034	0.043	0.017	0.021	0.0282	0.001	0.01	2	70.922
120	0.061	0.088	0.099	0.125	0.139	0.159		0.027	0.011	0.026	0.014	0.02	0.0196	0.001	0.01	2	102.041
120	0.063	0.091	0.105	0.129	0.145	0.159		0.028	0.014	0.024	0.016	0.014	0.0192	0.001	0.01	2	104.167
120	0.082	0.089	0.109	0.121	0.124	0.15		0.007	0.02	0.012	0.003	0.026	0.0136	0.001	0.01	2	147.059
180	0.059	0.089	0.125	0.159	0.165	0.17		0.03	0.036	0.034	0.006	0.005	0.0222	0.001	0.01	2	90.0901
180	0.055	0.085	0.12	0.151	0.161	0.162		0.03	0.035	0.031	0.01	0.001	0.0214	0.001	0.01	2	93.4579
180	0.063	0.095	0.131	0.154	0.165	0.168		0.032	0.036	0.023	0.011	0.003	0.021	0.001	0.01	2	95.2381

## Sheet: CAT
					Roots
Treat	0	1	2	3	0-1	1_2	2_3	Mean					CAT
0	0.223	0.184	0.111	0.094	0.039	0.073	0.017	0.039	1.3	352.3	2.34	0.42735	150.556
0	0.225	0.186	0.126	0.105	0.039	0.06	0.021	0.039	1.3	352.3	2.34	0.42735	150.556
0	0.228	0.19	0.119	0.109	0.038	0.071	0.01	0.038	1.3	352.3	2.28	0.438596	154.518
60	0.755	0.735	0.721	0.65	0.02	0.014	0.071	0.02	1.3	352.3	1.2	0.833333	293.583
60	0.744	0.725	0.711	0.65	0.019	0.014	0.061	0.019	1.3	352.3	1.14	0.877193	309.035
60	0.755	0.735	0.719	0.621	0.02	0.016	0.098	0.02	1.3	352.3	1.2	0.833333	293.583
120	0.855	0.841	0.811	0.8	0.014	0.03	0.011	0.014	1.3	352.3	0.84	1.19048	419.405
120	0.864	0.85	0.831	0.829	0.014	0.019	0.002	0.014	1.3	352.3	0.84	1.19048	419.405
120	0.874	0.86	0.841	0.839	0.014	0.019	0.002	0.014	1.3	362.7	0.84	1.19048	431.786
180	0.736	0.735	0.721	0.634	0.001	0.014	0.087	0.014	1.3	352.3	0.84	1.19048	419.405
180	0.751	0.735	0.721	0.634	0.016	0.014	0.087	0.016	1.3	352.3	0.96	1.04167	366.979
180	0.736	0.735	0.721	0.634	0.001	0.014	0.087	0.014	1.3	352.3	0.84	1.19048	419.405
					Leaves
Treat	0	1	2	3	0-1	1_2	2_3	Mean					CAT
0	0.229	0.184	0.111	0.094	0.045	0.073	0.017	0.045	1.3	352.3	2.7	0.37037	130.481
0	0.218	0.162	0.119	0.105	0.056	0.043	0.014	0.043	1.3	352.3	2.58	0.387597	136.55
0	0.24	0.165	0.114	0.095	0.075	0.051	0.019	0.051	1.3	352.3	3.06	0.326797	115.131
60	0.765	0.74	0.7	0.679	0.025	0.04	0.021	0.025	1.3	352.3	1.5	0.666667	234.867
60	0.755	0.73	0.661	0.665	0.025	0.069	-0.004	0.025	1.3	352.3	1.5	0.666667	234.867
60	0.754	0.73	0.725	0.615	0.024	0.005	0.11	0.024	1.3	352.3	1.44	0.694444	244.653
120	0.886	0.871	0.84	0.83	0.015	0.083	0.003	0.015	1.3	352.3	0.9	1.11111	391.444
120	0.8	0.785	0.702	0.699	0.015	0.031	0.01	0.015	1.3	352.3	0.9	1.11111	391.444
120	0.886	0.871	0.84	0.83	0.015	0.031	0.01	0.015	1.3	362.7	0.9	1.11111	403
180	0.744	0.725	0.711	0.65	0.019	0.014	0.061	0.019	1.3	362.7	1.14	0.877193	318.158
180	0.731	0.714	0.694	0.642	0.017	0.02	0.052	0.02	1.3	352.3	1.2	0.833333	293.583
180	0.759	0.726	0.719	0.701	0.033	0.007	0.018	0.018	1.3	352.3	1.08	0.925926	326.204

[truncated: 1 more sheets: APX]
